# Supplementary material for: Combined Metabarcoding and Multi-locus approach for Genetic characterization of Colletotrichum species associated with common walnut (Juglans regia) anthracnose in France
Source: PubMed Central journal article supplement (PMC6050315; doi:10.1038/s41598-018-29027-z), 2018-07-17
Supplement: 41598_2018_29027_MOESM1_ESM.pdf [file 41598_2018_29027_MOESM1_ESM.pdf]

**Combined Metabarcoding and Multi-locus approach for  
Genetic characterization of *Colletotrichum* species associated  
with common walnut (*Juglans regia*) anthracnose in France.**

**Daniele Da Lio<sup>1,#</sup>, José F. Cobo-Díaz<sup>1</sup>, Cyrielle Masson<sup>2</sup>, Morgane Chalopin<sup>1</sup>,  
Djiby Kebe<sup>2</sup>, Michel Giraud<sup>3</sup>, Agnes Verhaeghe<sup>4</sup>, Patrice Nodet<sup>1</sup>, Sabrina  
Sarrocchio<sup>5</sup>, Gaetan Le Floch<sup>1</sup>, Riccardo Baroncelli<sup>1,\*</sup>.**

<sup>1</sup> Laboratoire Universitaire de Biodiversité et Ecologie Microbienne, IBSAM, ESIAB,  
Université de Brest, EA 3882, Technopôle Brest-Iroise, 29280 Plouzané, France.

<sup>2</sup> Station Expérimentale Nucicole Rhône-Alpes, 385 A Route de St Marcellin, 38160  
Chatte, France

<sup>3</sup> Centre Technique Interprofessionnel des Fruits et Légumes, Centre de Lanxade, 28  
route des Nébouts, 24130 Prignonrieux, France

<sup>4</sup> CTIFL/SENuRA, 385 A Route de St Marcellin, 38160 Chatte, France

<sup>5</sup> Dipartimento di Scienze Agrarie, Alimentari e Agro-ambientali, Università di Pisa,  
Via del Borghetto 80 – 56124 - Pisa, Italy

<sup>#</sup> present address: Dipartimento di Scienze Agrarie, Alimentari e Agro-ambientali,  
Università di Pisa, Via del Borghetto 80 – 56124 - Pisa, Italy

\* Corresponding author: **Riccardo Baroncelli** ([riccardobaroncelli@gmail.com](mailto:riccardobaroncelli@gmail.com))

**Supplementary Table 1.** Information about the final alignments used for phylogenetic analyses

| <b>Locus</b>                                          | <b>boundaries</b> | <b>conserved</b> | <b>parsimony info</b> | <b>singleton</b> | <b>best substitution model</b> |
|-------------------------------------------------------|-------------------|------------------|-----------------------|------------------|--------------------------------|
| <i>Colletotrichum acutatum</i> species complex        |                   |                  |                       |                  |                                |
| ITS                                                   | 1-500             | 454              | 21                    | 20               | K2P+G                          |
| CHS-1                                                 | 501-763           | 224              | 24                    | 15               | K2P+G                          |
| TUB2                                                  | 764-1255          | 362              | 69                    | 60               | K2P+G                          |
| ACT                                                   | 1256-1496         | 159              | 43                    | 38               | K2P+G                          |
| HIS3                                                  | 1497-1875         | 274              | 82                    | 22               | TN93+G                         |
| GAPDH                                                 | 1876-2124         | 118              | 64                    | 53               | K2P+G                          |
| Concatenated                                          | 1-2124            | 1591             | 303                   | 208              | -                              |
| <i>Colletotrichum gloeosporioides</i> species complex |                   |                  |                       |                  |                                |
| ITS                                                   | 1-615             | 523              | 21                    | 61               | K2P+G                          |
| CHS-1                                                 | 616-916           | 231              | 35                    | 35               | K2P+G                          |
| CAL                                                   | 917-1705          | 590              | 95                    | 93               | K2P+G                          |
| ACT                                                   | 1706-2006         | 162              | 38                    | 84               | K2P                            |
| SOD2                                                  | 2007-2380         | 278              | 51                    | 45               | K2P+G                          |
| TUB2                                                  | 2381-3363         | 666              | 115                   | 160              | K2P+G                          |
| GS                                                    | 3364-4369         | 590              | 122                   | 204              | T92+G                          |
| GAPDH                                                 | 4370-4678         | 113              | 82                    | 93               | K2P                            |
| ApMAT                                                 | 4679-5716         | 505              | 209                   | 276              | K2P                            |
| Concatenated                                          | 1-5716            | 3658             | 768                   | 1051             | -                              |

Supplementary Table 2. Reference sequences used in the phylogenetic analyses.

| Species                   | strain      | ITS      | GAPDH    | TUB2     | CHS-1    | ACT      | HIS3     | GS | CAL | ApMAT |
|---------------------------|-------------|----------|----------|----------|----------|----------|----------|----|-----|-------|
| <i>C. abscissum</i>       | CBS 134727  | KC204988 | KC205022 | KC205056 | KC205039 | KC205073 | KC205003 | -  | -   | -     |
| <i>C. acerbum</i>         | CBS 128530  | JQ948459 | JQ948790 | JQ950110 | JQ949120 | JQ949780 | JQ949450 | -  | -   | -     |
| <i>C. acutatum</i>        | CBS 112996  | JQ005776 | JQ948677 | JQ005860 | JQ005797 | JQ005839 | JQ005818 | -  | -   | -     |
| <i>C. australe</i>        | CBS 116478  | JQ948455 | JQ948786 | JQ950106 | JQ949116 | JQ949776 | JQ949446 | -  | -   | -     |
| <i>C. brisbanense</i>     | CBS 292.67  | JQ948291 | JQ948621 | JQ949942 | JQ948952 | JQ949612 | JQ949282 | -  | -   | -     |
| <i>C. cairnsense</i>      | CBS 140847  | KU923672 | KU923704 | KU923688 | KU923710 | KU923716 | KU923722 | -  | -   | -     |
| <i>C. carthami</i>        | MAFF 239358 | •        | •        | •        | •        | •        | •        | -  | -   | -     |
| <i>C. chrysanthemi</i>    | CBS 126518  | JQ948271 | JQ948601 | JQ949922 | JQ948932 | JQ949592 | JQ949262 | -  | -   | -     |
| <i>C. citri</i>           | ZJUC41      | KC293581 | KC293741 | KC293661 |          | KC293621 |          | -  | -   | -     |
| <i>C. cosmi</i>           | CBS 853.73  | JQ948274 | JQ948604 | JQ949925 | JQ948935 | JQ949595 | JQ949265 | -  | -   | -     |
| <i>C. costaricense</i>    | CBS 330.75  | JQ948180 | JQ948510 | JQ949831 | JQ948841 | JQ949501 | JQ949171 | -  | -   | -     |
| <i>C. cuscutae</i>        | IMI 304802  | JQ948195 | JQ948525 | JQ949846 | JQ948856 | JQ949516 | JQ949186 | -  | -   | -     |
| <i>C. fioriniae</i>       | IMI 504882  | +        | +        | +        | +        | +        | +        | -  | -   | -     |
| <i>C. godetiae</i>        | CBS 133.44  | JQ948402 | JQ948733 | JQ950053 | JQ949063 | JQ949723 | JQ949393 | -  | -   | -     |
| <i>C. guajavae</i>        | IMI 350839  | JQ948270 | JQ948600 | JQ949921 | JQ948931 | JQ949591 | JQ949261 | -  | -   | -     |
| <i>C. indonesiense</i>    | CBS 127551  | JQ948288 | JQ948618 | JQ949939 | JQ948949 | JQ949609 | JQ949279 | -  | -   | -     |
| <i>C. johnstonii</i>      | IMI 357027  | JQ948443 | JQ948774 | JQ950094 | JQ949104 | JQ949764 | JQ949434 | -  | -   | -     |
| <i>C. kinghornii</i>      | CBS 198.35  | JQ948454 | JQ948785 | JQ950105 | JQ949115 | JQ949775 | JQ949445 | -  | -   | -     |
| <i>C. laticiphilum</i>    | CBS 112989  | JQ948289 | JQ948619 | JQ949940 | JQ948950 | JQ949610 | JQ949280 | -  | -   | -     |
| <i>C. limetticola</i>     | CBS 114.14  | JQ948193 | JQ948523 | JQ949844 | JQ948854 | JQ949514 | JQ949184 | -  | -   | -     |
| <i>C. lupini</i>          | CBS 109225  | JQ948155 | JQ948485 | JQ949806 | JQ948816 | JQ949476 | JQ949146 | -  | -   | -     |
| <i>C. melonis</i>         | CBS 159.84  | JQ948194 | JQ948524 | JQ949845 | JQ948855 | JQ949515 | JQ949185 | -  | -   | -     |
| <i>C. nymphaeae</i>       | IMI 504889  | +        | +        | +        | +        | +        | +        | -  | -   | -     |
| <i>C. paranaense</i>      | IMI 384185  | JQ948191 | JQ948521 | JQ949842 | JQ948852 | JQ949512 | JQ949182 | -  | -   | -     |
| <i>C. paxtonii</i>        | IMI 165753  | JQ948285 | JQ948615 | JQ949936 | JQ948946 | JQ949606 | JQ949276 | -  | -   | -     |
| <i>C. phormii</i>         | CBS 118194  | JQ948446 | JQ948777 | JQ950097 | JQ949107 | JQ949767 | JQ949437 | -  | -   | -     |
| <i>C. pyricola</i>        | CBS 128531  | JQ948445 | JQ948776 | JQ950096 | JQ949106 | JQ949766 | JQ949436 | -  | -   | -     |
| <i>C. rhombiforme</i>     | CBS 129953  | JQ948457 | JQ948788 | JQ950108 | JQ949118 | JQ949778 | JQ949448 | -  | -   | -     |
| <i>C. salicis</i>         | CBS 607.94  | +        | +        | +        | +        | +        | +        | -  | -   | -     |
| <i>C. scovillei</i>       | CBS 126529  | JQ948267 | JQ948597 | JQ949918 | JQ948928 | JQ949588 | JQ949258 | -  | -   | -     |
| <i>C. simmondsii</i>      | CBS 122122  | +        | +        | +        | +        | +        | +        | -  | -   | -     |
| <i>C. sloanei</i>         | IMI 364297  | JQ948287 | JQ948617 | JQ949938 | JQ948948 | JQ949608 | JQ949278 | -  | -   | -     |
| <i>C. tamarilloi</i>      | CBS 129814  | JQ948184 | JQ948514 | JQ949835 | JQ948845 | JQ949505 | JQ949175 | -  | -   | -     |
| <i>C. walleri</i>         | CBS 125472  | JQ948275 | JQ948605 | JQ949926 | JQ948936 | JQ949596 | JQ949266 | -  | -   | -     |
| <i>Colletotrichum</i> sp. | CBS 101611  | JQ948196 | JQ948526 | JQ949847 | JQ948857 | JQ949517 | JQ949187 | -  | -   | -     |
| <i>Colletotrichum</i> sp. | CBS 129810  | JQ948179 | JQ948509 | JQ949830 | JQ948840 | JQ949500 | JQ949170 | -  | -   | -     |

| Species                                 | strain         | ITS      | GAPDH    | TUB2     | CHS-1    | ACT      | HIS3     | GS       | CAL      | ApMAT    |
|-----------------------------------------|----------------|----------|----------|----------|----------|----------|----------|----------|----------|----------|
| <i>Colletotrichum</i> sp.               | CBS 129820     | JQ948183 | JQ948513 | JQ949834 | JQ948844 | JQ949504 | JQ949174 | -        | -        | -        |
| <i>Colletotrichum</i> sp.               | CBS 129821     | JQ948182 | JQ948512 | JQ949833 | JQ948843 | JQ949503 | JQ949173 | -        | -        | -        |
| <i>Colletotrichum</i> sp.               | CBS 129823     | JQ948192 | JQ948522 | JQ949843 | JQ948853 | JQ949513 | JQ949183 | -        | -        | -        |
| <i>C. orchidophilum</i>                 | CBS 632.80     | JQ948152 | JQ948482 | JQ949803 | JQ948813 | JQ949473 | JQ949143 | -        | -        | -        |
| <i>C. aenigma</i>                       | ICMP 18608     | JX010244 | JX010044 | JX010389 | JX009774 | JX009443 | -        | JX010078 | JX009683 | KM360143 |
| <i>C. aeshynomenes</i>                  | ICMP 17673     | JX010176 | JX009930 | JX010392 | JX009799 | JX009483 | -        | JX010081 | JX009721 | -        |
| <i>C. alatae</i>                        | ICMP 17919     | JX010190 | JX009990 | JX010383 | JX009837 | JX009471 | -        | JX010065 | JX009738 | KC888932 |
| <i>C. alienum</i>                       | ICMP 12071     | JX010251 | JX010028 | JX010411 | JX009882 | JX009572 | -        | JX010101 | JX009654 | KM360144 |
| <i>C. aotearoa</i>                      | ICMP 18537     | JX010205 | JX010005 | JX010420 | JX009853 | JX009564 | -        | JX010113 | JX009611 | KC888930 |
| <i>C. asianum</i>                       | ICMP 18580     | FJ972612 | JX010053 | JX010406 | JX009867 | JX009584 | -        | JX010096 | FJ917506 | FR718814 |
| <i>C. camelliae</i>                     | CGMCC 3.14925  | KJ955081 | KJ954782 | KJ955230 | -        | KJ954363 | -        | KJ954932 | KJ954634 | KJ954497 |
| <i>C. changpingense</i>                 | MFLUCC 15-0022 | KP683152 | KP852469 | KP852490 | KP852449 | KP683093 | -        | -        | -        | -        |
| <i>C. clidemiae</i>                     | ICMP 18658     | JX010265 | JX009989 | JX010438 | JX009877 | JX009537 | -        | JX010129 | JX009645 | KC888929 |
| <i>C. conoides</i>                      | CGMCC 3.17615  | KP890168 | KP890162 | KP890174 | KP890156 | KP890144 | -        | -        | KP890150 | -        |
| <i>C. cordylinicola</i>                 | ICMP 18579     | JX010226 | JX009975 | JX010440 | JX009864 | HM470235 | -        | JX010122 | HM470238 | JQ899274 |
| <i>C. endophytica</i>                   | MFLUCC 13-0418 | KC633854 | KC832854 | -        | -        | KF306258 | -        | -        | KC810018 | -        |
| <i>C. fructicola</i>                    | ICMP 18581     | JX010165 | JX010033 | JX010405 | JX009866 | FJ907426 | -        | JX010095 | FJ917508 | JQ807838 |
| <i>C. fructivorum</i>                   | CBS 133125     | JX145145 | -        | JX145196 | -        | -        | -        | -        | -        | JX145300 |
| <i>C. gloeosporioides</i>               | CBS 112999     | JQ005152 | JQ005239 | JQ005587 | JQ005326 | JQ005500 | -        | JX010085 | JQ005673 | JQ807843 |
| <i>C. grevilleae</i>                    | CBS 132879     | KC297078 | KC297010 | KC297102 | KC296987 | KC296941 | -        | KC297033 | KC296963 | -        |
| <i>C. grossum</i>                       | CGMCC3.17614   | KP890165 | KP890159 | KP890171 | KP890153 | KP890141 | -        | -        | KP890147 | -        |
| <i>C. hebeiense</i>                     | MFLUCC13-0726  | KF156863 | KF377495 | KF288975 | KF289008 | KF377532 | -        | -        | -        | -        |
| <i>C. henanense</i>                     | CGMCC 3.17354  | KJ955109 | KJ954810 | KJ955257 | -        | KM023257 | -        | KJ954960 | KJ954662 | KJ954524 |
| <i>C. horii</i>                         | ICMP 10492     | GQ329690 | GQ329681 | JX010450 | JX009752 | JX009438 | -        | JX010137 | JX009604 | JQ807840 |
| <i>C. jiangxiense</i>                   | CGMCC 3.17363  | KJ955201 | KJ954902 | KJ955348 | -        | KJ954471 | -        | KJ955051 | KJ954752 | KJ954607 |
| <i>C. kahawae</i> subsp. <i>ciggaro</i> | ICMP 18539     | JX010230 | JX009966 | JX010434 | JX009800 | JX009523 | -        | JX010132 | JX009635 | -        |
| <i>C. kahawae</i> subsp. <i>kahawae</i> | ICMP 17816     | JX010231 | JX010012 | JX010444 | JX009813 | JX009452 | -        | JX010130 | JX009642 | JQ894579 |
| <i>C. musae</i>                         | ICMP 19119     | JX010146 | JX010050 | HQ596280 | JX009896 | JX009433 | -        | JX010103 | JX009742 | KC888926 |
| <i>C. nupharicola</i>                   | ICMP 18187     | JX010187 | JX009972 | JX010398 | JX009835 | JX009437 | -        | JX010088 | JX009663 | JX145319 |
| <i>C. proteae</i>                       | CBS 132882     | KC297079 | KC297009 | KC297101 | KC296986 | KC296940 | -        | -        | KC296960 | -        |
| <i>C. psidii</i>                        | ICMP 19120     | JX010219 | JX009967 | JX010443 | JX009901 | JX009515 | -        | JX010133 | JX009743 | KC888931 |
| <i>C. queenslandicum</i>                | ICMP 1778      | JX010276 | JX009934 | JX010414 | JX009899 | JX009447 | -        | JX010104 | JX009691 | KC888928 |
| <i>C. rhexiae</i>                       | CBS 133134     | JX145128 | -        | JX145179 | -        | -        | -        | -        | -        | JX145290 |
| <i>C. salsolae</i>                      | ICMP 19051     | JX010242 | JX009916 | JX010403 | JX009863 | JX009562 | -        | JX010093 | JX009696 | KC888925 |
| <i>C. siamense</i>                      | ICMP 18578     | JX010171 | JX009924 | JX010404 | JX009865 | FJ907423 | -        | JX010094 | FJ917505 | JQ899289 |
| <i>C. syzygicola</i>                    | MFLUCC 10-0624 | KF242094 | KF242156 | KF254880 | -        | KF157801 | -        | KF242125 | KF254859 | -        |
| <i>C. temperatum</i>                    | CBS 133122     | JX145159 | -        | JX145211 | -        | -        | -        | -        | -        | JX145298 |
| <i>C. theobromicola</i>                 | ICMP 18649     | JX010294 | JX010006 | JX010447 | JX009869 | JX009444 | -        | JX010139 | JX009591 | KC790726 |
| <i>C. ti</i>                            | ICMP 4832      | JX010269 | JX009952 | JX010442 | JX009898 | JX009520 | -        | JX010123 | JX009649 | KM360146 |

| Species                 | strain        | ITS      | GAPDH    | TUB2     | CHS-1    | ACT      | HIS3 | GS       | CAL      | ApMAT    |
|-------------------------|---------------|----------|----------|----------|----------|----------|------|----------|----------|----------|
| <i>C. tropicale</i>     | ICMP 18653    | JX010264 | JX010007 | JX010407 | JX009870 | JX009489 | -    | JX010097 | JX009719 | KC790728 |
| <i>C. viniferum</i>     | GZAAS 5.08601 | JN412804 | JN412798 | JN412813 | -        | JN412795 | -    | JN412787 | JQ309639 | -        |
| <i>C. wuxiense</i>      | CGMCC 3.17894 | KU251591 | KU252045 | KU252200 | KU251939 | KU251672 | -    | KU252101 | KU251833 | KU251722 |
| <i>C. xanthorrhoeae</i> | ICMP 17903    | JX010261 | JX009927 | JX010448 | JX009823 | JX009478 | -    | JX010138 | JX009653 | KC790689 |
| <i>C. sydowii</i>       | CBS 135819    | KY263783 | KY263785 | KY263793 | KY263787 | KY263791 | -    | -        | -        | -        |

• = Sequences retrieved directly from the genome deposited on NARO database (<http://www.gene.affrc.go.jp/>)

+ = Sequences retrieved directly from the genome deposited on NCBI database (<http://www.ncbi.nlm.nih.gov/>)
